# Supplementary material
Source: PubMed Central journal article supplement (PMC3335931)
Supplement: NIHMS358614-supplement-1.pdf [file NIHMS358614-supplement-1.pdf]

**ONLINE SUPPLEMENT**

**Silent Intralesional Microhemorrhage as a Risk Factor for Brain AVM Rupture**

## Supplemental Tables

| Outcome: Index ICH                |            |       |       |         |     |              |       |       |         |     |
|-----------------------------------|------------|-------|-------|---------|-----|--------------|-------|-------|---------|-----|
|                                   | Univariate |       |       |         |     | Multivariate |       |       |         |     |
|                                   | OR         | Lower | Upper | P Value | N   | OR           | Lower | Upper | P Value | N   |
| Evidence of old hemorrhage (EOOH) | 4.42       | 2.44  | 8.01  | < 0.001 | 975 | 3.97         | 2.10  | 7.50  | < 0.001 | 882 |
| Age at diagnosis (decade)         | 0.89       | 0.82  | 0.95  | 0.001   | 973 | 0.87         | 0.80  | 0.95  | 0.002   | 882 |
| Sex (male)                        | 0.87       | 0.67  | 1.11  | 0.262   | 975 | 0.94         | 0.70  | 1.25  | 0.652   | 882 |
| Deep only venous drainage         | 3.96       | 2.79  | 5.62  | < 0.001 | 932 | 2.51         | 1.66  | 3.79  | < 0.001 | 882 |
| Maximal AVM size (cm)             | 0.73       | 0.66  | 0.80  | < 0.001 | 929 | 0.73         | 0.65  | 0.81  | < 0.001 | 882 |
| Deep location                     | 2.26       | 1.59  | 3.20  | < 0.001 | 970 | 1.77         | 1.16  | 2.71  | 0.009   | 882 |
| Associated arterial aneurysm      | 1.26       | 0.95  | 1.67  | 0.102   | 891 | 1.67         | 1.21  | 2.29  | 0.002   | 882 |

  

| Outcome: new ICH after diagnosis  |            |       |       |         |     |              |       |       |         |     |
|-----------------------------------|------------|-------|-------|---------|-----|--------------|-------|-------|---------|-----|
|                                   | Univariate |       |       |         |     | Multivariate |       |       |         |     |
|                                   | HR         | Lower | Upper | P Value | N   | HR           | Lower | Upper | P Value | N   |
| Evidence of old hemorrhage (EOOH) | 2.08       | 0.93  | 4.64  | 0.074   | 699 | 3.53         | 1.35  | 9.23  | 0.010   | 643 |

|                              |      |      |      |       |     |      |      |      |       |     |
|------------------------------|------|------|------|-------|-----|------|------|------|-------|-----|
| Age at diagnosis (decade)    | 1.22 | 0.99 | 1.50 | 0.063 | 699 | 1.19 | 0.92 | 1.53 | 0.178 | 643 |
| Sex (male)                   | 1.00 | 0.50 | 1.97 | 0.992 | 699 | 0.72 | 0.32 | 1.64 | 0.439 | 643 |
| Deep only venous drainage    | 0.84 | 0.30 | 2.41 | 0.750 | 683 | 0.81 | 0.24 | 2.72 | 0.740 | 643 |
| Maximal AVM size (cm)        | 0.85 | 0.69 | 1.07 | 0.162 | 681 | 0.91 | 0.68 | 1.21 | 0.510 | 643 |
| Deep location                | 0.70 | 0.27 | 1.83 | 0.472 | 696 | 1.06 | 0.35 | 3.21 | 0.917 | 643 |
| Associated arterial aneurysm | 1.00 | 0.48 | 2.09 | 0.990 | 644 | 1.26 | 0.53 | 2.99 | 0.593 | 643 |

**Supplemental Table S1.** Univariate and multivariable associations for association of EOOH with index ICH (top panel) and new ICH after diagnosis (bottom panel). Variables are indicator variables unless otherwise noted. Restricted to same sample as multivariable model, univariate effects similar (DNS).

|                              | Univariate |       |       |         |     | Multivariate |       |       |         |    |
|------------------------------|------------|-------|-------|---------|-----|--------------|-------|-------|---------|----|
|                              | OR         | Lower | Upper | P Value | N   | OR           | Lower | Upper | P Value | N  |
| Hemosiderin positive         | 2.18       | 1.03  | 4.61  | 0.042   | 127 | 3.64         | 1.11  | 12.00 | 0.034   | 79 |
| Age at diagnosis (decade)    | 0.85       | 0.72  | 0.99  | 0.044   | 148 | 0.58         | 0.42  | 0.79  | 0.001   | 79 |
| Sex (male)                   | 0.54       | 0.27  | 1.08  | 0.081   | 148 | 0.66         | 0.22  | 2.02  | 0.470   | 79 |
| Deep only venous drainage    | 10.42      | 2.78  | 39.08 | 0.001   | 125 | 8.09         | 1.29  | 50.91 | 0.026   | 79 |
| Maximal AVM size (cm)        | 1.14       | 0.87  | 1.49  | 0.355   | 122 | 0.98         | 0.62  | 1.56  | 0.942   | 79 |
| Deep location                | 2.34       | 0.55  | 9.90  | 0.247   | 125 | 0.36         | 0.05  | 2.75  | 0.326   | 79 |
| Associated arterial aneurysm | 1.56       | 0.66  | 3.65  | 0.308   | 99  | 3.25         | 1.24  | 18.90 | 0.023   | 79 |

**Supplemental Table S2.** Univariate and multivariable associations for association of hemosiderin positivity with index ICH. Restricted to same sample as multivariable model, univariate effects similar (DNS).

## Supplemental Figures

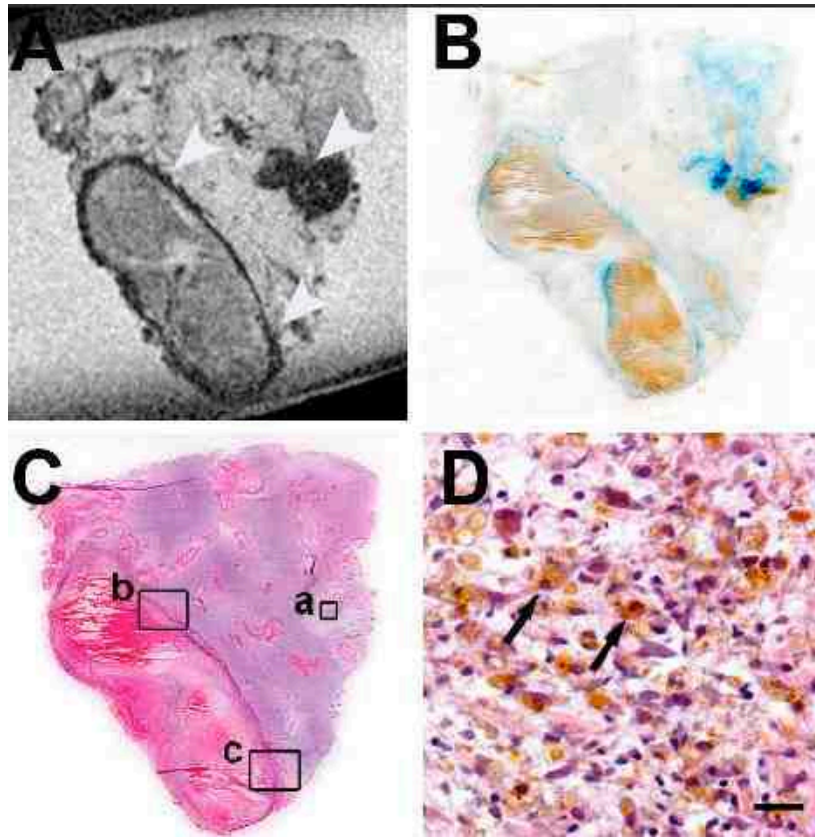

**Supplemental Figure S1.** Comparison of MR image with corresponding histological image in lesional tissue from an unruptured bAVM. We made a 1 mm-thick section of a resected surgical specimen that had been flash-frozen immediately after harvest in Optimal Cutting Temperature (OCT) medium. Adjacent sections were stained with H&E and Prussian Blue. The section was placed into a plastic tube suspended in saline that was doped with 1 part in 100 of Gadolinium DTPA. The tube was placed in a solenoid coil and imaged in a 1.5 T Siemens Symphony scanner (Siemens Medical Systems, Erlangen, Germany). A 3D gradient recalled echo sequence was used with the following parameters: TR/TE/flip angle = 30ms/7ms/25°; 2 averages; partition thickness = 0.43mm; FOV = 60mm x 30mm; matrix = 256 x 128 x 20; voxel size = 0.23 mm x 0.23 mm x 0.43 mm; Acquisition time = 2 min 33 sec. A single slice is shown from the 3D data reformatted to lie in a plane corresponding to that of the histological slice. Iron-rich regions cause susceptibility effects on gradient recalled images, which result in pronounced T2\* effects. Regions of T2\* signal loss appear as hypointense.

**A.** AVM image shows signal loss with associated blooming artifact (**white arrow head**). **B.** Prussian blue stain shows areas of iron deposition (**blue color**) corresponding to signal void in MR image. **C.** H&E stain shows histological structure. **D.** A high magnification image of the area (a) in C shows a large number of hemosiderin-laden macrophages (**arrows**). The corresponding area in MR image shows signal void. Scale bar for **D**: 20um.

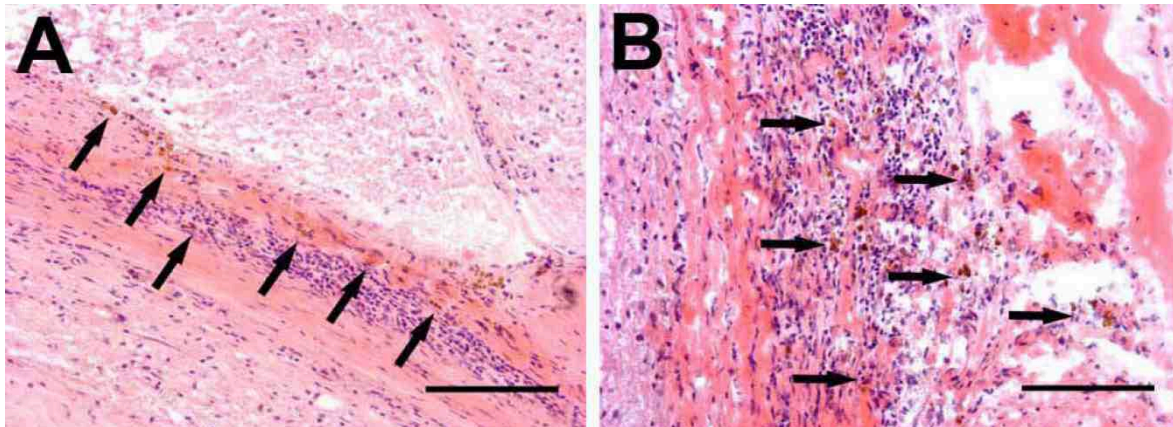

**Supplemental Figure S2.** Histological image of lesional tissue from the unruptured bAVM shown in Figure 2. A & B show higher magnification from selected areas (b) and (c) in Figure 2C. Hemosiderin deposition was detected in the vessel wall (arrows). Scale bars: 100  $\mu$  m.
